# Supplementary figures and images for: Machine learning-based automated phenotyping of inflammatory nocifensive behavior in mice
Source: PubMed Central journal article supplement — Mol Pain. 2020 Sep 21;16:1744806920958596. doi: 10.1177/1744806920958596 (PMC7509709; doi:10.1177/1744806920958596), 2020-09-21

# Arena 4 Mice 85:111

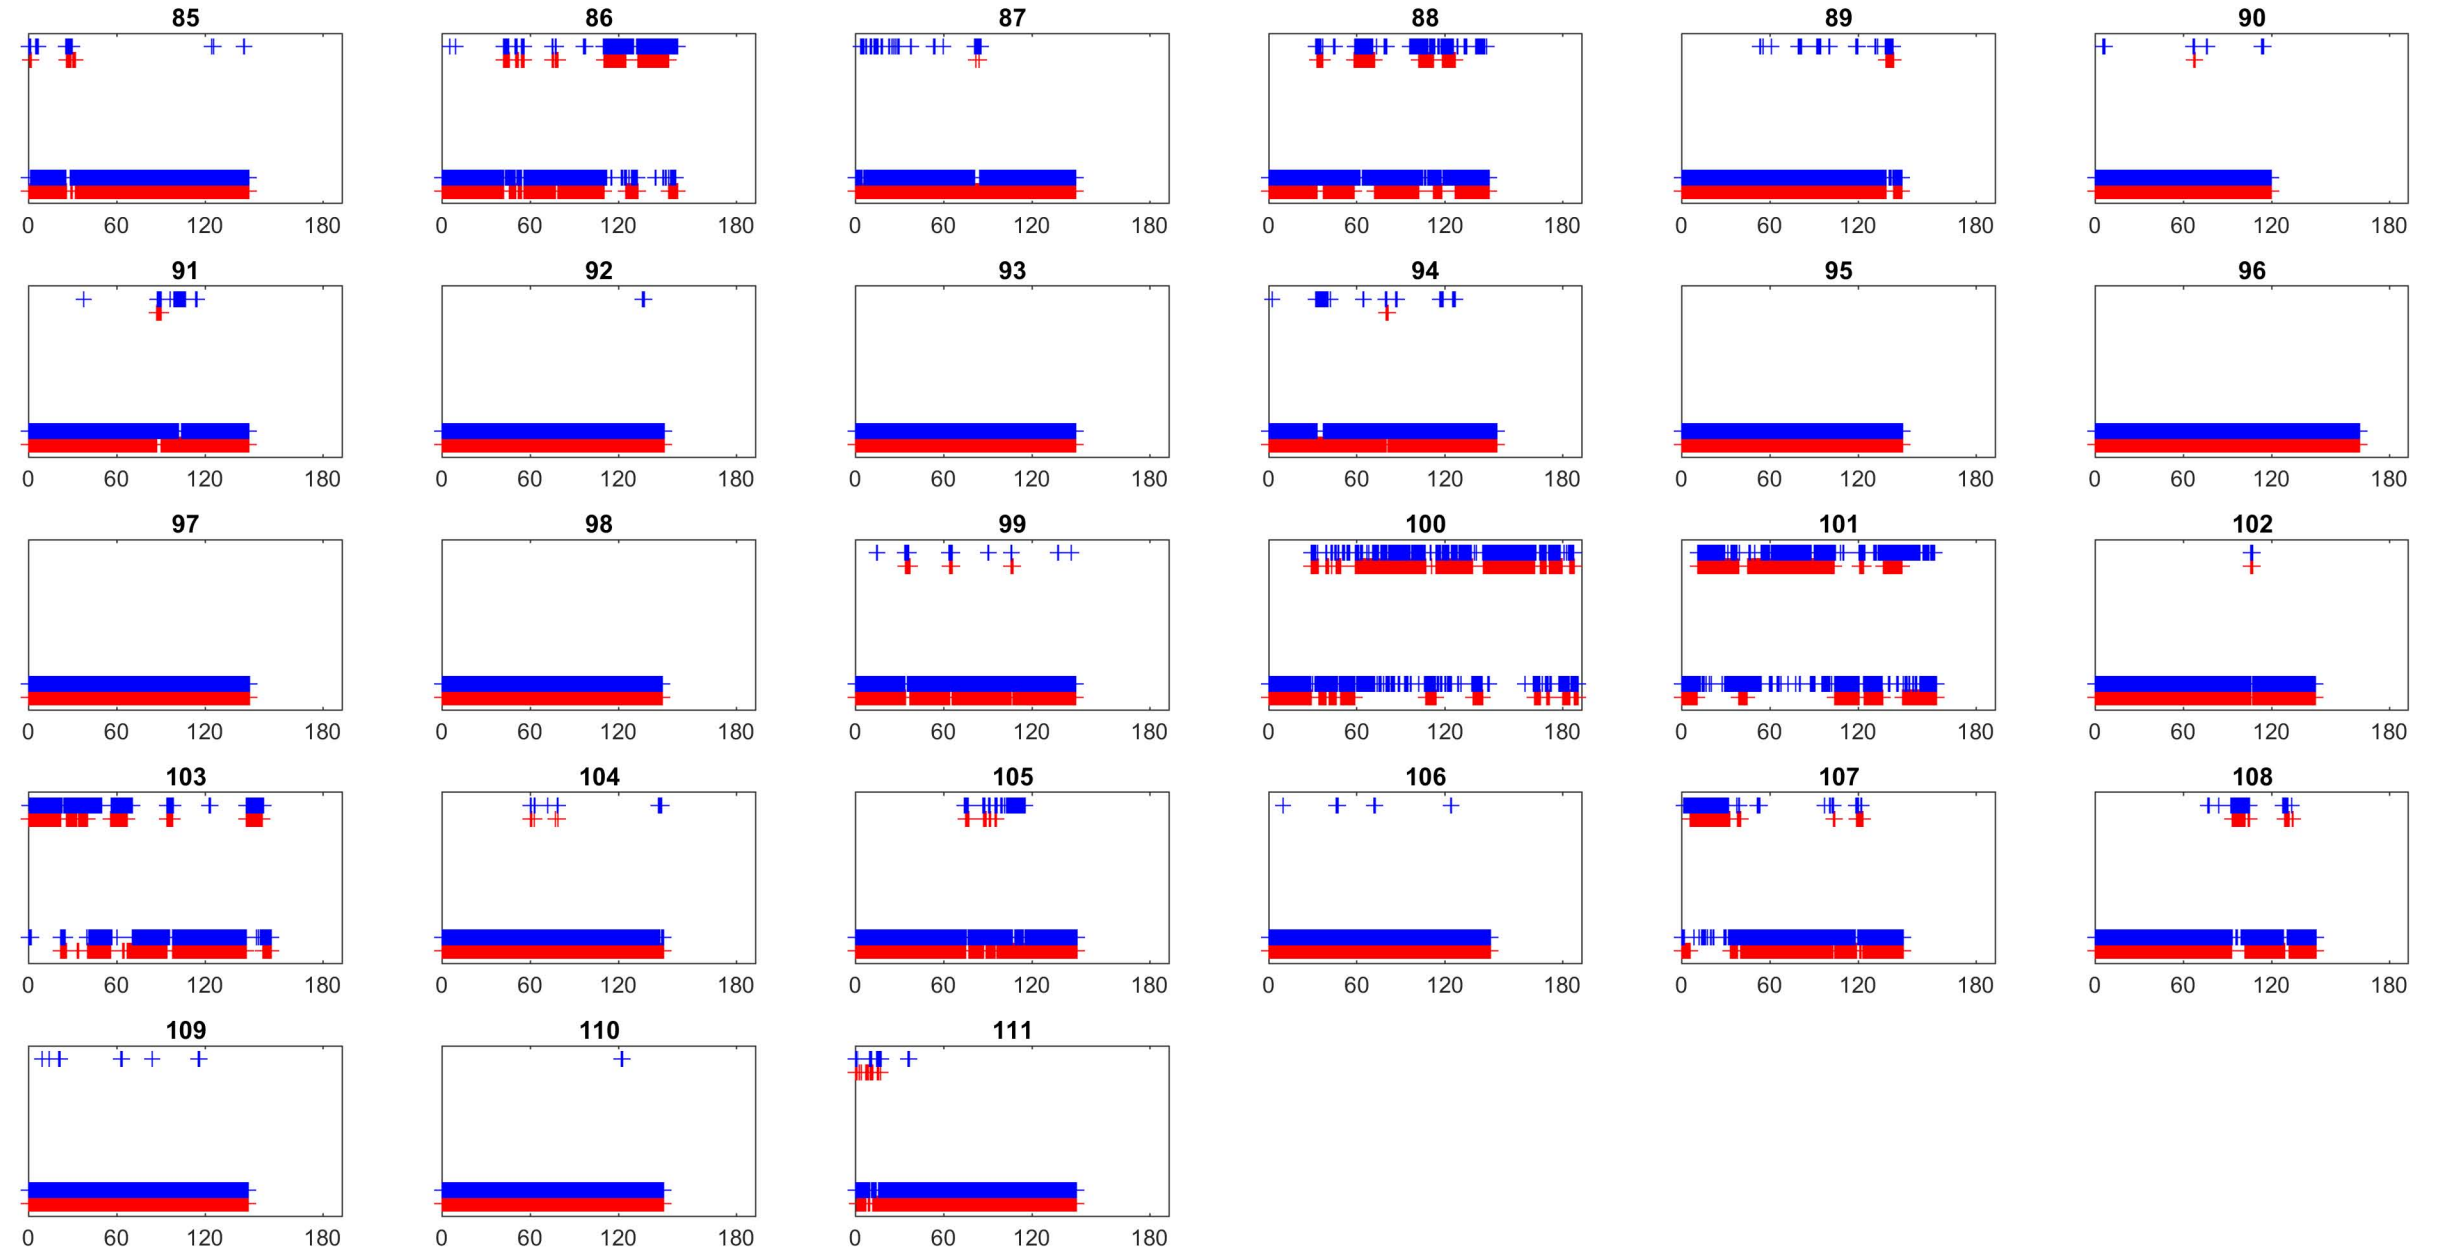

Supplement: sj-pdf-1-mpx-10.1177_1744806920958596.pdf [file sj-pdf-1-mpx-10.1177_1744806920958596.pdf]

# Arena 2 Mice 30:57

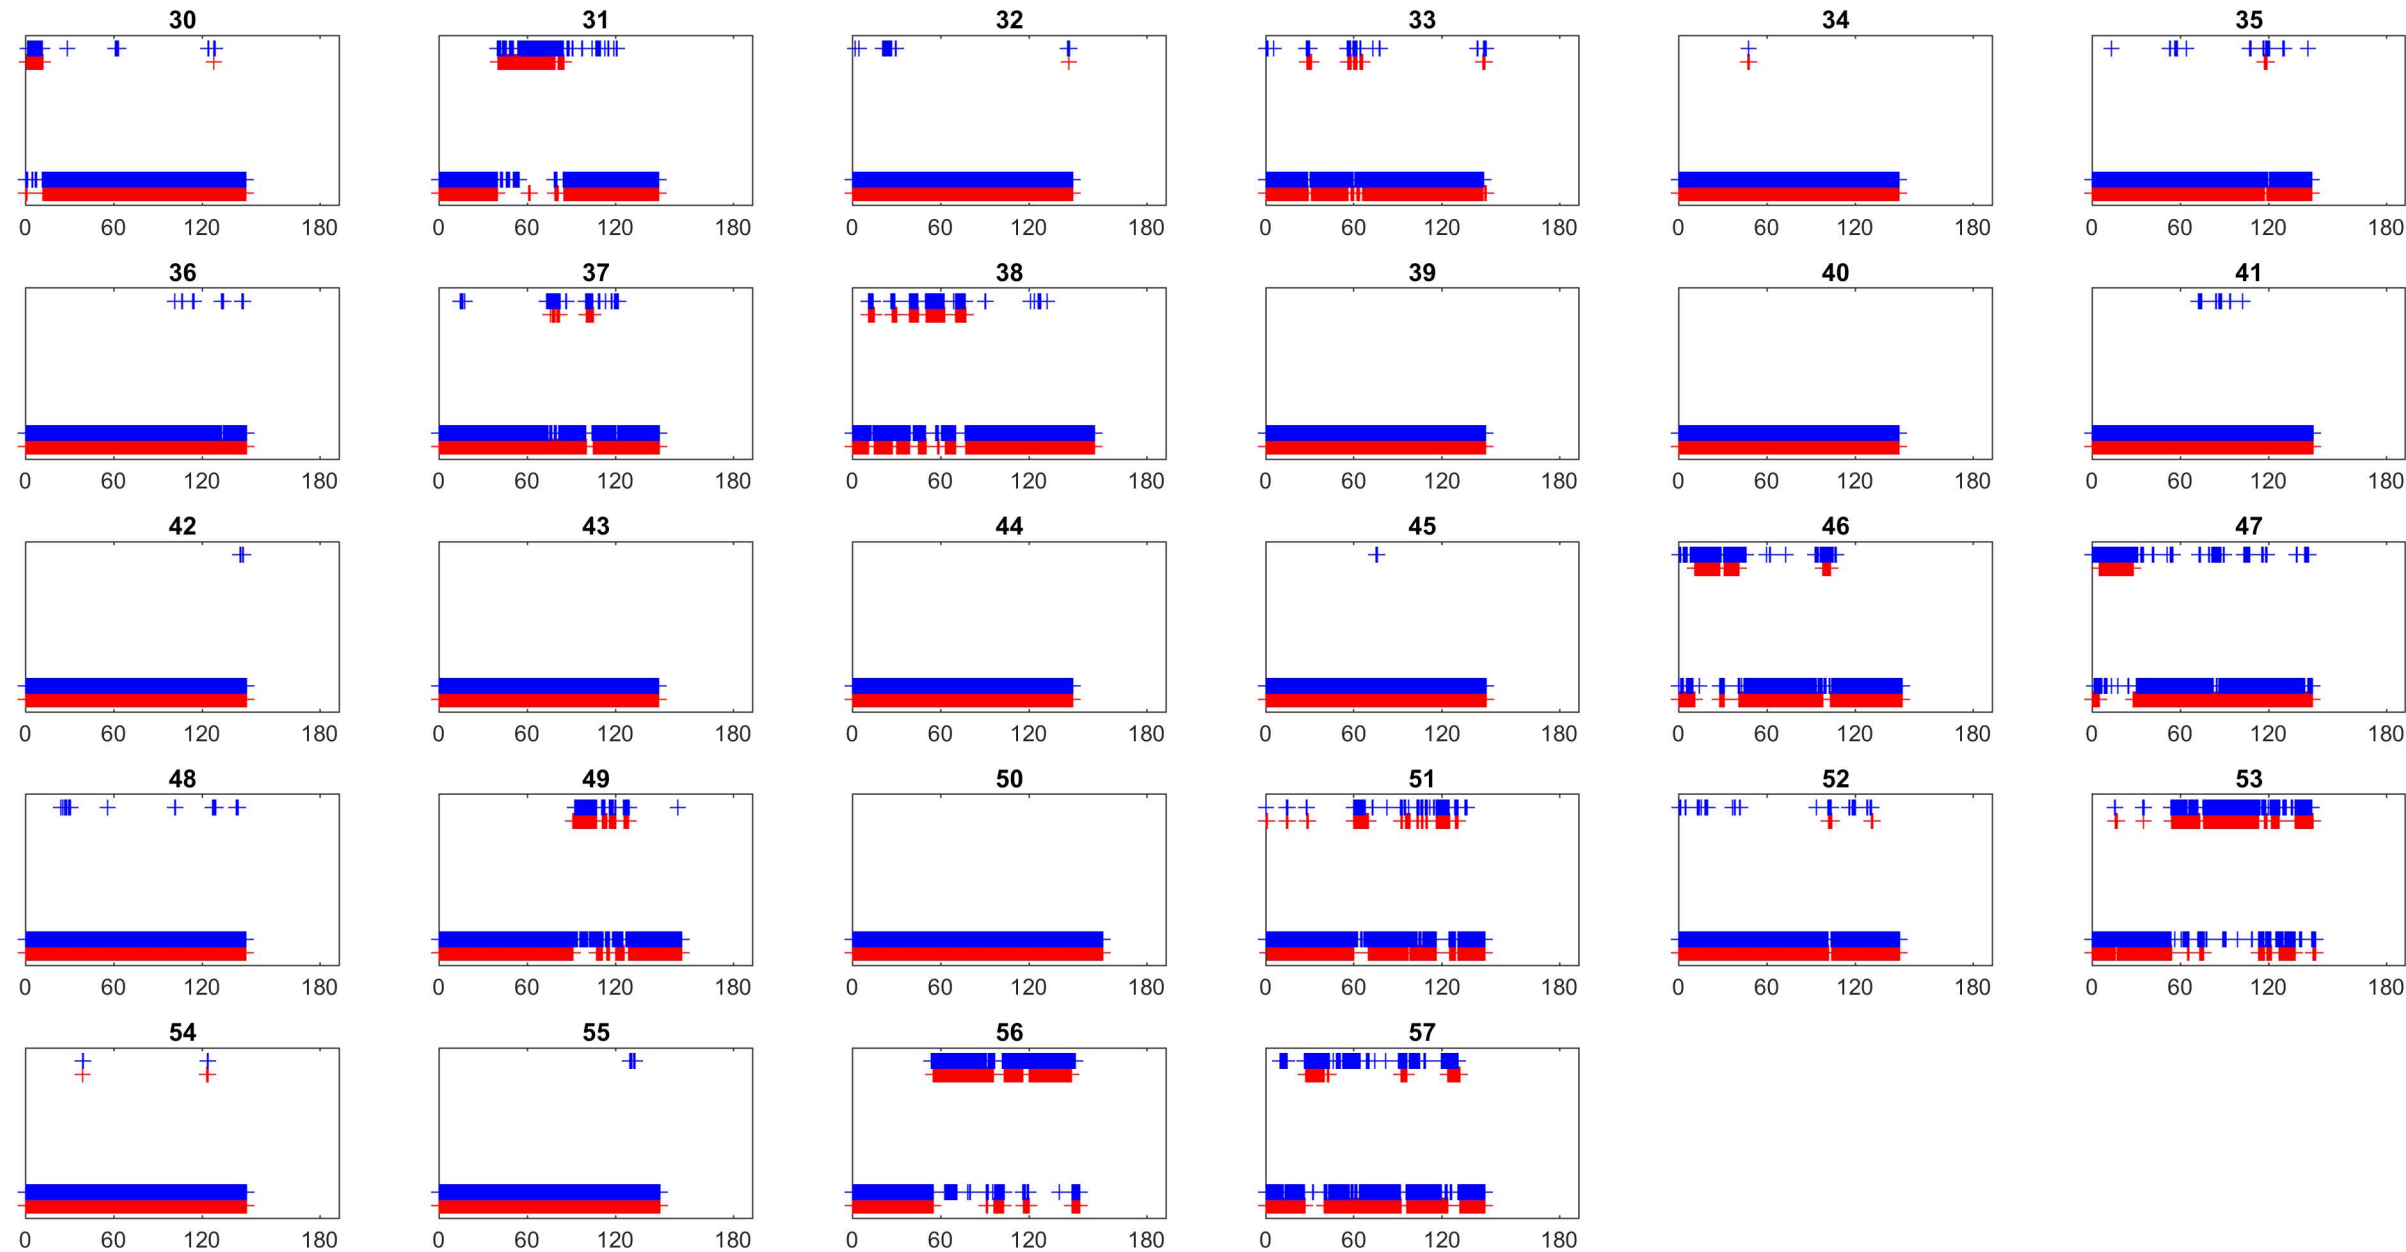

Supplement: sj-pdf-4-mpx-10.1177_1744806920958596.pdf [file sj-pdf-4-mpx-10.1177_1744806920958596.pdf]
